# Supplementary material for: Property Graph vs RDF Triple Store: A Comparison on Glycan Substructure Search
Source: PLoS One. 2015 Dec 14;10(12):e0144578. doi: 10.1371/journal.pone.0144578 (PMC4684231; doi:10.1371/journal.pone.0144578)
Supplement: S4 Table — Query response times obtain using the Jena Fuseki implementation. The query structure IDs refer to S8 and S7 Tables. (XLSX) [file pone.0144578.s005.xlsx]

## Sheet: graphResultsRDF_BioQuery_JenaFu
First query-set
Query Structure ID	1	2	3	4	5	6	7	8	9	10	Results		Jena Fuseki average time		Jena Fuseki Standard deviation
1	2.587	2.049	1.86	1.817	1.837	1.786	1.793	1.804	1.808	1.795	86		1.83878		0.0822158
2	2.107	2.14	2.096	2.112	2.133	2.106	2.127	2.152	2.1	2.126	10		2.12133		0.0190329
3	1.731	1.685	1.665	1.678	1.675	1.676	1.637	1.633	1.639	1.644	1638		1.65911		0.0206243
4	1.076	1.058	1.071	1.052	1.07	1.071	1.057	1.054	1.058	1.057	760		1.06089		0.0075902
5	0.603	0.612	0.612	0.612	0.631	0.615	0.615	0.62	0.619	0.614	1		0.616667		0.00612372
6	0.615	0.64	0.62	0.616	0.617	0.613	0.616	0.614	0.612	0.614	21		0.618		0.00858778
7	1.997	1.977	1.975	1.964	1.99	1.972	1.97	2.001	1.968	1.965	279		1.97578		0.0122656
8	1.963	1.981	1.97	1.963	1.972	1.958	1.967	1.975	1.958	1.984	67		1.96978		0.00929755
9	1.948	1.961	1.959	1.954	1.966	1.948	1.936	1.97	1.945	1.971	8		1.95667		0.0119373
10	1.987	1.98	1.983	1.966	1.986	1.978	1.976	1.958	2.01	1.982	92		1.97989		0.0143566
11	2.084	2.064	2.051	2.045	2.067	2.043	2.051	2.043	2.051	2.047	2582		2.05133		0.00868907
12	2.027	2.035	2.029	2.057	2.021	2.027	2.026	2.035	2.035	2.028	786		2.03256		0.0103454
13	1.969	1.945	1.941	1.955	1.957	1.956	1.98	1.957	1.975	1.947	20		1.957		0.0130288
14	1.97	1.945	1.964	1.96	1.971	1.96	1.941	1.959	1.969	1.944	7		1.957		0.011068
15	1.791	1.762	1.771	1.766	1.767	1.778	1.752	1.757	1.75	1.766	11		1.76322		0.0090108
16	1.776	1.771	1.766	1.752	1.752	1.752	1.774	1.771	1.764	1.757	2		1.76211		0.00902004
17	2	1.981	1.981	1.962	2.015	1.994	1.991	1.968	1.961	1.963	1309		1.97956		0.0182353
18	2	1.998	1.985	1.965	1.981	1.974	1.979	1.992	1.977	1.982	318		1.98144		0.00968389
19	1.998	2.004	1.992	2.007	1.987	1.996	2.001	1.993	1.983	2.002	82		1.99611		0.00806915
20	0.969	0.97	0.959	0.957	0.956	0.963	0.966	0.96	0.977	0.962	1798		0.963333		0.00674537
21	0.918	0.909	0.904	0.927	0.909	0.916	0.905	0.926	0.903	0.9	301		0.911		0.00989949
22	0.93	0.936	0.928	0.925	0.931	0.928	0.936	0.933	0.926	0.947	28		0.932222		0.0068516
23	0.959	0.961	0.953	0.954	0.956	0.952	0.962	0.969	0.956	0.963	687		0.958444		0.00563718
24	1.046	1.039	1.035	1.033	1.042	1.034	1.034	1.034	1.036	1.038	29		1.03611		0.00297676
25	1.699	1.709	1.711	1.722	1.7	1.687	1.699	1.714	1.716	1.698	12		1.70622		0.0109747
26	1.632	1.603	1.618	1.601	1.625	1.603	1.616	1.623	1.603	1.62	9		1.61244		0.00979938
27	1.514	1.508	1.526	1.52	1.514	1.502	1.537	1.503	1.515	1.502	21		1.51411		0.012015
28	1.514	1.52	1.519	1.523	1.518	1.506	1.533	1.544	1.514	1.518	7		1.52167		0.0110114
29	0.904	0.888	0.894	0.895	0.929	0.884	0.902	0.891	0.881	0.893	54		0.895222		0.0141048
30	1.972	2.047	1.987	1.99	1.972	2.006	1.973	1.996	1.971	2.023	311		1.99611		0.0256829
31	1.144	1.136	1.145	1.142	1.127	1.133	1.125	1.137	1.124	1.122	89		1.13233		0.00827647
32	0.901	0.893	0.894	0.892	0.899	0.894	0.902	0.907	0.889	0.888	8		0.895333		0.00620484
33	1.51	1.508	1.505	1.509	1.505	1.528	1.506	1.527	1.536	1.517	206		1.51567		0.0118322
34	2.145	2.125	2.119	2.159	2.131	2.153	2.128	2.147	2.114	2.126	104		2.13356		0.0156853
35	1.531	1.502	1.531	1.502	1.524	1.511	1.526	1.504	1.531	1.505	150		1.51511		0.012693
36	1.521	1.517	1.517	1.512	1.523	1.53	1.529	1.524	1.53	1.523	57		1.52278		0.00639878
37	1.69	1.704	1.687	1.686	1.677	1.684	1.673	1.679	1.678	1.696	10		1.68489		0.00987983
38	1.698	1.704	1.703	1.688	1.708	1.68	1.71	1.685	1.702	1.699	83		1.69767		0.0106888
39	1.711	1.691	1.682	1.71	1.688	1.704	1.671	1.689	1.713	1.686	142		1.69267		0.0137295
40	1.649	1.646	1.641	1.677	1.634	1.644	1.647	1.656	1.634	1.672	20		1.65011		0.0154227
41	1.765	1.743	1.743	1.763	1.754	1.758	1.754	1.782	1.773	1.731	2924		1.75567		0.0157639
42	1.667	1.709	1.671	1.679	1.671	1.71	1.665	1.682	1.669	1.7	1362		1.684		0.017713
43	1.091	1.119	1.085	1.104	1.126	1.106	1.094	1.114	1.086	1.108	3488		1.10467		0.0141863
44	1.717	1.665	1.676	1.687	1.696	1.681	1.676	1.668	1.674	1.695	39		1.67978		0.0109975
45	1.499	1.51	1.493	1.534	1.496	1.513	1.508	1.5	1.51	1.501	20		1.50722		0.0121735
46	1.707	1.7	1.696	1.679	1.682	1.694	1.684	1.683	1.697	1.684	324		1.68878		0.00785458
47	1.666	1.661	1.658	1.673	1.668	1.674	1.667	1.654	1.645	1.652	248		1.66133		0.00994987
48	1.669	1.673	1.662	1.678	1.658	1.684	1.662	1.659	1.705	1.658	12		1.671		0.0158981
49	1.69	1.668	1.678	1.67	1.672	1.67	1.677	1.683	1.673	1.703	17		1.67711		0.0107987
50	1.692	1.672	1.662	1.685	1.672	1.702	1.668	1.679	1.678	1.671	23		1.67656		0.0116416
51	1.676	1.691	1.688	1.668	1.699	1.669	1.704	1.668	1.675	1.68	13		1.68244		0.0137032
52	1.676	1.69	1.688	1.672	1.676	1.68	1.681	1.715	1.694	1.708	26		1.68933		0.0144309
53	1.514	1.525	1.539	1.518	1.529	1.515	1.507	1.536	1.502	1.526	206		1.52189		0.0124944
54	1.52	1.505	1.516	1.506	1.498	1.528	1.496	1.516	1.497	1.5	52		1.50689		0.0109481
55	1.508	1.501	1.504	1.499	1.508	1.498	1.516	1.518	1.51	1.498	41		1.50578		0.00766123
56	1.733	1.762	1.72	1.756	1.746	1.754	1.745	1.731	1.729	1.733	1955		1.74178		0.0142283
57	1.731	1.697	1.719	1.741	1.713	1.703	1.702	1.73	1.723	1.728	469		1.71733		0.0147564
58	1.686	1.688	1.699	1.683	1.692	1.68	1.684	1.679	1.679	1.695	84		1.68656		0.00736735
59	1.681	1.661	1.676	1.667	1.662	1.664	1.653	1.636	1.663	1.637	9872		1.65767		0.0134164
60	1.503	1.492	1.492	1.499	1.479	1.504	1.477	1.49	1.483	1.491	117		1.48967		0.00883176
61	1.513	1.47	1.488	1.48	1.483	1.485	1.503	1.471	1.488	1.475	1		1.48256		0.0102361
62	1.939	1.943	1.931	1.944	1.937	1.94	1.938	1.939	1.954	1.961	7		1.943		0.00919239
63	1.966	1.971	1.964	1.956	1.964	1.966	1.962	1.979	1.973	1.973	36		1.96756		0.00701981
64	1.952	1.936	1.947	1.953	1.957	1.96	1.936	1.97	1.943	1.939	1		1.949		0.0118322
65	1.986	1.984	1.997	1.994	1.987	1.975	1.975	1.995	1.992	1.977	180		1.98622		0.00887099
66	1.96	2.007	1.998	1.975	1.97	1.98	1.96	1.976	1.973	1.966	14		1.97833		0.0150582
67	1.955	1.938	1.939	1.945	1.936	1.949	1.95	1.937	1.971	1.957	93		1.94689		0.0115048
68	0.888	0.864	0.864	0.871	0.861	0.873	0.859	0.857	0.862	0.864	336		0.863889		0.00520683
69	1.668	1.654	1.658	1.644	1.663	1.654	1.654	1.672	1.646	1.655	418		1.65556		0.00839808
70	1.583	1.568	1.58	1.572	1.578	1.572	1.584	1.585	1.59	1.575	1		1.57822		0.00718988
71	2.265	2.282	2.277	2.281	2.273	2.292	2.259	2.28	2.249	2.298	195		2.27678		0.0151639
72	2.342	2.329	2.338	2.33	2.304	2.314	2.344	2.596	2.303	2.303	1679		2.35122		0.0931085
73	1.133	1.143	1.133	1.121	1.142	1.124	1.126	1.131	1.144	1.127	2530		1.13233		0.00874643
74	1.76	1.766	1.765	1.754	1.762	1.749	1.76	1.776	1.775	1.773	221		1.76444		0.00931546
75	1.766	1.747	1.734	1.745	1.738	1.748	1.76	1.756	1.736	1.746	47		1.74556		0.00871939
76	1.75	1.753	1.749	1.771	1.773	1.772	1.753	1.744	1.778	1.745	48		1.75978		0.0134979
77	1.11	1.117	1.116	1.114	1.122	1.136	1.126	1.116	1.115	1.119	59		1.12011		0.00706124
78	0.816	0.819	0.828	0.83	0.815	0.827	0.823	0.819	0.816	0.814	9		0.821222		0.00599537
79	2.127	2.125	2.132	2.128	2.147	2.126	2.125	2.139	2.142	2.148	810		2.13467		0.00946044
80	1.963	1.949	1.995	1.947	1.948	1.95	1.962	1.951	1.97	1.946	170		1.95756		0.0161486
81	2.171	2.15	2.154	2.158	2.159	2.207	2.151	2.169	2.158	2.165	1133		2.16344		0.0174436
82	2.233	2.219	2.232	2.225	2.246	2.225	2.242	2.224	2.231	2.22	40		2.22933		0.00940744
83	1.062	1.066	1.067	1.051	1.053	1.053	1.053	1.052	1.053	1.057	206		1.05611		0.00611237
84	1.978	1.974	1.966	1.982	1.998	1.961	1.966	1.984	1.985	1.961	16		1.97522		0.0128138
85	0.874	0.868	0.867	0.861	0.871	0.868	0.873	0.876	0.881	0.887	1587		0.872444		0.00790745
86	1.944	1.946	1.945	1.94	1.964	1.956	1.988	1.946	1.966	1.975	334		1.95844		0.0160943
87	2.13	2.149	2.129	2.141	2.132	2.145	2.13	2.135	2.136	2.134	776		2.13678		0.0068516
88	0.922	0.923	0.918	0.923	0.92	0.92	0.917	0.918	0.924	0.92	332		0.920333		0.0025
89	0.929	0.953	0.929	0.923	0.925	0.928	0.938	0.93	0.922	0.933	332		0.931222		0.00956266
90	0.863	0.878	0.868	0.869	0.863	0.874	0.859	0.86	0.889	0.862	304		0.869111		0.0098291
91	1.941	1.949	1.932	1.959	1.947	1.954	1.931	1.941	1.928	1.939	67		1.94222		0.0108025
92	2.129	2.145	2.111	2.135	2.139	2.128	2.119	2.14	2.152	2.126	138		2.13278		0.0129786
93	0.919	0.925	0.922	0.919	0.925	0.927	0.916	0.917	0.925	0.916	55		0.921333		0.00438748
94	0.929	0.918	0.924	0.919	0.914	0.915	0.914	0.92	0.929	0.933	55		0.920667		0.00674537
95	1.944	1.926	1.958	1.927	1.933	1.943	1.944	1.978	1.98	1.937	13		1.94733		0.0204083
96	1.94	1.943	1.936	1.943	1.956	1.952	1.941	1.954	1.954	1.935	12		1.946		0.00812404
97	2.152	2.121	2.119	2.112	2.119	2.126	2.124	2.116	2.144	2.115	194		2.12178		0.00940449
98	0.896	0.885	0.887	0.87	0.876	0.897	0.874	0.882	0.878	0.878	44		0.880778		0.00807431
99	1.09	1.123	1.089	1.08	1.094	1.087	1.081	1.097	1.082	1.098	3488		1.09233		0.0133417
100	1.009	1.019	1.021	1.023	1.011	1.002	1.016	1.008	1.016	1.013	1426		1.01433		0.00663325
101	1.033	1.018	1.012	1.019	1.011	1.01	1.017	1.015	1.008	1.007	1426		1.013		0.00441588
102	1.086	1.098	1.077	1.112	1.079	1.092	1.076	1.107	1.091	1.079	3488		1.09011		0.0134578
103	1.726	1.725	1.751	1.741	1.742	1.755	1.739	1.734	1.725	1.723	2924		1.73722		0.0114976
104	0.997	0.992	0.997	0.99	0.989	0.995	0.997	1.003	0.993	1.01	173		0.996222		0.00668539
105	1.003	0.994	0.998	0.999	0.995	1.011	0.994	1.016	0.996	1	252		1.00033		0.00785812
106	1.053	1.038	1.055	1.065	1.04	1.042	1.048	1.047	1.053	1.044	345		1.048		0.00851469
107	1.036	1.028	1.026	1.034	1.036	1.031	1.037	1.028	1.029	1.031	3		1.03111		0.00382245
108	1.037	1.043	1.035	1.034	1.031	1.028	1.028	1.023	1.052	1.029	176		1.03367		0.00888819
109	1.673	1.661	1.655	1.671	1.658	1.665	1.658	1.659	1.664	1.66	1362		1.66122		0.00479004
110	2.353	2.357	2.37	2.379	2.365	2.36	2.372	2.353	2.36	2.4	2713		2.36844		0.014345
111	2.283	2.291	2.277	2.285	2.283	2.289	2.288	2.28	2.289	2.282	1332		2.28489		0.00472875
112	1.675	1.69	1.675	1.68	1.693	1.674	1.691	1.686	1.686	1.694	324		1.68544		0.0075185
113	1.648	1.644	1.653	1.644	1.643	1.646	1.641	1.643	1.657	1.656	172		1.64744		0.00614636
114	2.103	2.136	2.121	2.132	2.102	2.137	2.109	2.115	2.123	2.125	28		2.12222		0.0119873
115	1.383	1.367	1.385	1.366	1.35	1.357	1.357	1.363	1.362	1.355	2643		1.36244		0.0100761
116	0.984	1.001	0.998	0.985	0.988	0.981	0.992	0.98	0.983	0.984	47		0.988		0.00748331
117	0.877	0.874	0.875	0.887	0.887	0.873	0.875	0.885	0.873	0.87	364		0.877667		0.00668954
118	1.664	1.662	1.655	1.697	1.646	1.66	1.667	1.654	1.669	1.657	418		1.663		0.0145258
119	1.658	1.652	1.649	1.657	1.681	1.64	1.645	1.651	1.64	1.651	85		1.65178		0.0123164
120	0.947	0.944	0.938	0.95	0.939	0.94	0.938	0.939	0.94	0.94	1798		0.940889		0.00385501
121	0.941	0.923	0.94	0.926	0.929	0.929	0.923	0.928	0.93	0.921	271		0.927667		0.00561249
122	0.926	0.921	0.92	0.921	0.92	0.926	0.915	0.922	0.92	0.919	28		0.920444		0.00287711
123	1.711	1.719	1.712	1.721	1.717	1.727	1.718	1.733	1.751	1.715	1955		1.72367		0.012052
124	0.966	0.957	0.961	0.961	0.973	0.956	0.957	0.961	0.966	0.962	1552		0.961556		0.00529413
125	0.89	0.91	0.902	0.909	0.904	0.899	0.91	0.911	0.894	0.893	301		0.903556		0.00701981
126	1.089	1.078	1.091	1.083	1.081	1.083	1.1	1.083	1.081	1.084	114		1.08489		0.00666041
127	1.064	1.064	1.069	1.061	1.058	1.043	1.05	1.059	1.042	1.046	3419		1.05467		0.00972111
128	2.26	2.268	2.252	2.262	2.246	2.28	2.273	2.269	2.239	2.293	2031		2.26467		0.017
Second query-set
Query Structure ID	1	2	3	4	5	6	7	8	9	10	Results		Jena Fuseki average time		Jena Fuseki Standard deviation
1	5.135	1.086	0.936	0.947	0.969	0.917	0.923	0.939	0.919	0.935	3		0.952333		0.0526047
2	2.445	2.39	2.383	2.387	2.38	2.386	2.391	2.384	2.382	2.409	3		2.388		0.00866025
3	2.382	2.371	2.379	2.36	2.371	2.363	2.375	2.374	2.361	2.367	6		2.369		0.00665207
4	2.574	2.557	2.557	2.56	2.574	2.554	2.566	2.561	2.556	2.575	3		2.56222		0.0077746
5	2.312	2.309	2.29	2.324	2.297	2.294	2.292	2.298	2.315	2.292	3		2.30122		0.0119664
6	2.682	2.641	2.655	2.643	2.644	2.646	2.649	2.647	2.654	2.66	10		2.64878		0.00632016
7	2.665	2.666	2.658	2.65	2.651	2.647	2.638	2.642	2.644	2.644	3		2.64889		0.00865223
8	2.695	2.623	2.626	2.604	2.623	2.614	2.62	2.624	2.617	2.642	16		2.62144		0.0102239
9	2.658	2.64	2.632	2.629	2.64	2.631	2.647	2.648	2.647	2.645	10		2.63989		0.00752404
10	2.659	2.628	2.625	2.644	2.65	2.648	2.633	2.634	2.629	2.64	3		2.63678		0.00909365
11	2.667	2.643	2.653	2.656	2.657	2.657	2.653	2.663	2.689	2.649	12		2.65778		0.0129786
12	2.692	2.67	2.676	2.666	2.667	2.652	2.685	2.655	2.659	2.686	4		2.66844		0.0121974
13	2.849	2.813	2.812	2.82	2.816	2.844	2.832	2.826	2.832	2.821	9		2.824		0.0105238
14	2.945	2.91	2.891	2.898	2.904	2.899	2.916	2.905	2.886	2.905	20		2.90156		0.0092346
15	2.925	2.892	2.908	2.881	2.907	2.931	2.948	2.904	2.907	2.916	12		2.91044		0.0198186
16	2.9	2.901	2.925	2.888	2.89	2.905	2.896	2.898	2.903	2.894	6		2.9		0.0109545
17	3.034	3.046	3.017	3.042	3.042	3.006	3.017	3.014	3.026	3.032	10		3.02689		0.0143479
18	3.045	3.023	3.045	3.045	3.033	3.044	3.025	3.038	3.042	3.038	6		3.037		0.0083666
19	3.036	3.041	3.034	3.037	3.03	3.035	3.056	3.037	3.06	3.026	3		3.03956		0.011348
20	2.564	2.591	2.574	2.545	2.571	2.558	2.559	2.565	2.571	2.562	3		2.56622		0.0127943
21	2.579	2.547	2.563	2.572	2.574	2.543	2.562	2.553	2.562	2.557	4		2.55922		0.0104137
22	2.66	2.661	2.655	2.658	2.686	2.644	2.664	2.65	2.671	2.671	6		2.66222		0.0126271
23	2.675	2.651	2.663	2.667	2.644	2.67	2.651	2.689	2.667	2.658	4		2.66222		0.0133489
24	2.734	2.675	2.701	2.675	2.678	2.667	2.675	2.674	2.681	2.686	21		2.67911		0.00971396
25	2.673	2.682	2.651	2.678	2.64	2.67	2.64	2.67	2.643	2.654	3		2.65867		0.0165756
26	2.654	2.66	2.656	2.659	2.671	2.665	2.689	2.664	2.644	2.644	3		2.66133		0.0137659
27	2.421	2.411	2.385	2.396	2.403	2.411	2.398	2.398	2.395	2.417	4		2.40156		0.00995127
28	2.729	2.684	2.683	2.666	2.682	2.668	2.673	2.663	2.668	2.675	13		2.67356		0.00792324
29	2.565	2.567	2.549	2.557	2.542	2.588	2.556	2.542	2.541	2.536	3		2.55311		0.0163435
30	2.668	2.672	2.673	2.679	2.693	2.673	2.675	2.672	2.659	2.668	13		2.67378		0.00906612
31	2.664	2.667	2.65	2.659	2.661	2.673	2.653	2.673	2.679	2.675	3		2.66556		0.0102848
32	2.822	2.7	2.713	2.704	2.723	2.696	2.708	2.69	2.723	2.706	55		2.707		0.0112805
33	2.755	2.698	2.685	2.729	2.674	2.699	2.684	2.706	2.657	2.679	42		2.69011		0.0207632
34	2.637	2.641	2.651	2.653	2.655	2.636	2.641	2.64	2.642	2.666	6		2.64722		0.00964077
35	2.624	2.632	2.623	2.647	2.617	2.66	2.621	2.649	2.658	2.665	3		2.64133		0.0183916
36	2.904	2.893	2.877	2.883	2.909	2.89	2.885	2.88	2.886	2.9	20		2.88922		0.0101462
37	2.986	3.019	3.013	3.024	3.009	3.036	3.057	3.093	3.001	3.036	10		3.032		0.0284209
38	2.668	2.635	2.671	2.622	2.651	2.64	2.647	2.669	2.65	2.629	3		2.646		0.0166508
39	2.665	2.668	2.642	2.661	2.653	2.665	2.653	2.663	2.649	2.652	11		2.65622		0.00849673
40	3.036	3.034	3.039	3.022	3.044	3.026	3.041	3.026	3.037	3.019	3		3.032		0.00897218
41	2.609	2.586	2.588	2.586	2.586	2.58	2.62	2.614	2.579	2.6	7		2.59322		0.0148137
42	2.566	2.54	2.569	2.561	2.535	2.543	2.545	2.555	2.57	2.538	7		2.55067		0.0134443
43	2.639	2.643	2.652	2.683	2.654	2.64	2.641	2.645	2.653	2.643	10		2.65044		0.013324
44	0.916	0.905	0.907	0.911	0.912	0.909	0.921	0.918	0.923	0.908	3		0.912667		0.00646142
45	2.563	2.553	2.548	2.555	2.545	2.549	2.533	2.542	2.592	2.548	7		2.55167		0.0164317
46	2.671	2.65	2.672	2.638	2.673	2.641	2.653	2.646	2.668	2.652	3		2.65478		0.0131603
47	2.673	2.683	2.684	2.667	2.693	2.689	2.665	2.675	2.667	2.662	22		2.67611		0.0114613
48	2.344	2.334	2.336	2.362	2.322	2.348	2.323	2.339	2.324	2.332	3		2.33556		0.0130203
49	3.103	3.144	3.1	3.109	3.11	3.151	3.119	3.119	3.112	3.127	2		3.12122		0.0168061
50	2.667	2.656	2.669	2.656	2.666	2.657	2.676	2.652	2.656	2.667	12		2.66167		0.00804674
51	1.691	1.688	1.685	1.681	1.693	1.681	1.665	1.678	1.666	1.702	2		1.68211		0.011879
52	2.68	2.665	2.668	2.652	2.664	2.694	2.683	2.654	2.675	2.676	16		2.67011		0.013467
53	3.099	3.115	3.083	3.106	3.096	3.097	3.095	3.105	3.087	3.128	2		3.10133		0.0139732
54	2.537	2.347	2.358	2.381	2.352	2.352	2.369	2.356	2.358	2.353	32		2.35844		0.0104297
55	2.913	2.915	2.91	2.905	2.919	2.909	2.903	2.914	2.917	2.945	12		2.91522		0.0123772
56	2.321	2.325	2.344	2.321	2.332	2.32	2.324	2.316	2.326	2.318	3		2.32511		0.00853587
57	2.628	2.659	2.633	2.635	2.628	2.643	2.612	2.63	2.621	2.631	3		2.63244		0.0132298
58	2.906	2.933	2.912	2.916	2.912	2.916	2.898	2.907	2.915	2.919	6		2.91422		0.00940449
59	3.238	3.217	3.223	3.247	3.202	3.238	3.204	3.23	3.216	3.229	15		3.22289		0.0148866
60	3.217	3.197	3.205	3.199	3.211	3.2	3.219	3.207	3.212	3.209	18		3.20656		0.00710829
