# Supplementary material for: Property Graph vs RDF Triple Store: A Comparison on Glycan Substructure Search
Source: PLoS One. 2015 Dec 14;10(12):e0144578. doi: 10.1371/journal.pone.0144578 (PMC4684231; doi:10.1371/journal.pone.0144578)
Supplement: S8 Table — List of 128 query relevant biological epitopes used in this study. For completeness, we provide here the GlycoCT encoded structure, the 2d image (cfg format) and the size, in terms of residues, of each epitope. These structures are mainly very short and short according to the partition explained in the paper. (XLSX) [file pone.0144578.s009.xlsx]

## Sheet: S4 Query structure IDs
Query Structure ID	GlycoCT code	Size
1	RES 1b:x-dglc-HEX-1:5 2s:n-acetyl 3b:b-dgal-HEX-1:5 4b:b-dglc-HEX-1:5 5s:n-acetyl 6b:b-dgal-HEX-1:5 7s:sulfate 8s:sulfate LIN 1:1d(2+1)2n 2:1o(4+1)3d 3:3o(3+1)4d 4:4d(2+1)5n 5:4o(4+1)6d 6:4o(6+1)7n 7:1o(6+1)8n	8
2	RES 1b:x-dglc-HEX-1:5 2s:n-acetyl 3b:b-dgal-HEX-1:5 4b:b-dglc-HEX-1:5|6:a 5s:sulfate LIN 1:1d(2+1)2n 2:1o(4+1)3d 3:3o(3+1)4d 4:4o(3+1)5n	5
3	RES 1b:a-dman-HEX-1:5 2b:b-dglc-HEX-1:5 3s:n-acetyl 4b:b-dgal-HEX-1:5 5b:a-dgro-dgal-NON-2:6|1:a|2:keto|3:d 6s:n-acetyl LIN 1:1o(2+1)2d 2:2d(2+1)3n 3:2o(4+1)4d 4:4o(3+2)5d 5:5d(5+1)6n	6
4	RES 1b:a-dman-HEX-1:5 2b:a-dman-HEX-1:5 3b:a-dman-HEX-1:5 LIN 1:1o(2+1)2d 2:2o(2+1)3d	3
5	RES 1b:a-lgal-HEX-1:5|6:d 2b:b-dglc-HEX-1:5 3s:n-acetyl 4b:b-dgal-HEX-1:5 5b:a-dgro-dgal-NON-2:6|1:a|2:keto|3:d 6s:n-acetyl LIN 1:1o(3+1)2d 2:2d(2+1)3n 3:2o(4+1)4d 4:4o(3+2)5d 5:5d(5+1)6n	6
6	RES 1b:a-lgal-HEX-1:5|6:d 2b:b-dglc-HEX-1:5 LIN 1:1o(3+1)2d	2
7	RES 1b:b-dglc-HEX-1:5 2s:n-acetyl 3b:b-dgal-HEX-1:5 4b:a-lgal-HEX-1:5|6:d LIN 1:1d(2+1)2n 2:1o(3+1)3d 3:1o(4+1)4d	4
8	RES 1b:b-dglc-HEX-1:5 2s:n-acetyl 3b:b-dgal-HEX-1:5 4b:a-dgro-dgal-NON-2:6|1:a|2:keto|3:d 5s:n-acetyl 6b:a-lgal-HEX-1:5|6:d LIN 1:1d(2+1)2n 2:1o(3+1)3d 3:3o(3+2)4d 4:4d(5+1)5n 5:1o(4+1)6d	6
9	RES 1b:b-dglc-HEX-1:5 2s:n-acetyl 3b:b-dgal-HEX-1:5 4s:sulfate 5b:a-lgal-HEX-1:5|6:d LIN 1:1d(2+1)2n 2:1o(3+1)3d 3:3o(3+1)4n 4:1o(4+1)5d	5
10	RES 1b:b-dglc-HEX-1:5 2s:n-acetyl 3b:b-dgal-HEX-1:5 4b:a-lgal-HEX-1:5|6:d 5b:a-lgal-HEX-1:5|6:d LIN 1:1d(2+1)2n 2:1o(3+1)3d 3:3o(2+1)4d 4:1o(4+1)5d	5
11	RES 1b:b-dglc-HEX-1:5 2s:n-acetyl 3b:a-lgal-HEX-1:5|6:d 4b:b-dgal-HEX-1:5 LIN 1:1d(2+1)2n 2:1o(3+1)3d 3:1o(4+1)4d	4
12	RES 1b:b-dglc-HEX-1:5 2s:n-acetyl 3b:a-lgal-HEX-1:5|6:d 4b:b-dgal-HEX-1:5 5b:a-dgro-dgal-NON-2:6|1:a|2:keto|3:d 6s:n-acetyl LIN 1:1d(2+1)2n 2:1o(3+1)3d 3:1o(4+1)4d 4:4o(3+2)5d 5:5d(5+1)6n	6
13	RES 1b:b-dglc-HEX-1:5 2s:n-acetyl 3b:a-lgal-HEX-1:5|6:d 4b:b-dgal-HEX-1:5 5s:sulfate LIN 1:1d(2+1)2n 2:1o(3+1)3d 3:1o(4+1)4d 4:4o(3+1)5n	5
14	RES 1b:b-dglc-HEX-1:5 2s:n-acetyl 3b:a-lgal-HEX-1:5|6:d 4b:b-dgal-HEX-1:5 5b:a-dgro-dgal-NON-2:6|1:a|2:keto|3:d 6s:n-acetyl 7s:sulfate LIN 1:1d(2+1)2n 2:1o(3+1)3d 3:1o(4+1)4d 4:4o(3+2)5d 5:5d(5+1)6n 6:4o(6+1)7n	7
15	RES 1b:b-dglc-HEX-1:5 2s:n-acetyl 3b:a-lgal-HEX-1:5|6:d 4b:b-dgal-HEX-1:5 5b:a-dgro-dgal-NON-2:6|1:a|2:keto|3:d 6s:n-acetyl 7s:sulfate LIN 1:1d(2+1)2n 2:1o(3+1)3d 3:1o(4+1)4d 4:4o(3+2)5d 5:5d(5+1)6n 6:1o(6+1)7n	7
16	RES 1b:b-dglc-HEX-1:5 2s:n-acetyl 3b:a-lgal-HEX-1:5|6:d 4b:b-dgal-HEX-1:5 5b:a-dgro-dgal-NON-2:6|1:a|2:keto|3:d 6s:n-acetyl 7s:sulfate 8s:sulfate LIN 1:1d(2+1)2n 2:1o(3+1)3d 3:1o(4+1)4d 4:4o(3+2)5d 5:5d(5+1)6n 6:4o(6+1)7n 7:1o(6+1)8n	8
17	RES 1b:x-dglc-HEX-1:5 2s:n-acetyl 3b:b-dgal-HEX-1:5 LIN 1:1d(2+1)2n 2:1o(3+1)3d	3
18	RES 1b:b-dglc-HEX-1:5 2s:n-acetyl 3b:a-lgal-HEX-1:5|6:d 4b:b-dgal-HEX-1:5 5b:a-lgal-HEX-1:5|6:d LIN 1:1d(2+1)2n 2:1o(3+1)3d 3:1o(4+1)4d 4:4o(2+1)5d	5
19	RES 1b:b-dglc-HEX-1:5 2s:n-acetyl 3b:a-lgal-HEX-1:5|6:d 4b:b-dgal-HEX-1:5 5b:b-dglc-HEX-1:5 6s:n-acetyl 7b:b-dgal-HEX-1:5 8b:a-dgro-dgal-NON-2:6|1:a|2:keto|3:d 9s:n-acetyl LIN 1:1d(2+1)2n 2:1o(3+1)3d 3:1o(4+1)4d 4:4o(3+1)5d 5:5d(2+1)6n 6:5o(4+1)7d 7:7o(3+2)8d 8:8d(5+1)9n	9
20	RES 1b:a-dgal-HEX-1:5 2s:n-acetyl 3b:b-dgal-HEX-1:5 LIN 1:1d(2+1)2n 2:1o(3+1)3d	3
21	RES 1b:a-dgal-HEX-1:5 2s:n-acetyl 3b:a-dgro-dgal-NON-2:6|1:a|2:keto|3:d 4s:n-acetyl LIN 1:1d(2+1)2n 2:1o(6+2)3d 3:3d(5+1)4n	4
22	RES 1b:a-dgal-HEX-1:5 2s:n-acetyl 3b:b-dgal-HEX-1:5 4b:a-dgro-dgal-NON-2:6|1:a|2:keto|3:d 5s:n-acetyl 6b:a-dgro-dgal-NON-2:6|1:a|2:keto|3:d 7s:n-acetyl LIN 1:1d(2+1)2n 2:1o(3+1)3d 3:3o(3+2)4d 4:4d(5+1)5n 5:1o(6+2)6d 6:6d(5+1)7n	7
23	RES 1b:a-dgal-HEX-1:5 2s:n-acetyl 3b:b-dglc-HEX-1:5 4s:n-acetyl 5b:b-dgal-HEX-1:5 LIN 1:1d(2+1)2n 2:1o(6+1)3d 3:3d(2+1)4n 4:3o(4+1)5d	5
24	RES 1b:x-dgal-HEX-1:5 2b:a-dgro-dgal-NON-2:6|1:a|2:keto|3:d 3s:n-acetyl 4b:a-dgro-dgal-NON-2:6|1:a|2:keto|3:d 5s:n-acetyl 6b:a-dgro-dgal-NON-2:6|1:a|2:keto|3:d 7s:n-acetyl LIN 1:1o(3+2)2d 2:2d(5+1)3n 3:2o(8+2)4d 4:4d(5+1)5n 5:4o(8+2)6d 6:6d(5+1)7n	7
25	RES 1b:b-dglc-HEX-1:5 2b:b-dgal-HEX-1:5 3b:a-dgro-dgal-NON-2:6|1:a|2:keto|3:d 4s:n-acetyl 5b:a-dgro-dgal-NON-2:6|1:a|2:keto|3:d 6s:n-acetyl 7b:a-dgro-dgal-NON-2:6|1:a|2:keto|3:d 8s:n-acetyl 9b:b-dgal-HEX-1:5 10s:n-acetyl 11b:b-dgal-HEX-1:5 LIN 1:1o(4+1)2d 2:2o(3+2)3d 3:3d(5+1)4n 4:3o(8+2)5d 5:5d(5+1)6n 6:5o(8+2)7d 7:7d(5+1)8n 8:2o(4+1)9d 9:9d(2+1)10n 10:9o(3+1)11d	11
26	RES 1b:b-dglc-HEX-1:5 2b:b-dgal-HEX-1:5 3b:b-dglc-HEX-1:5 4s:n-acetyl 5b:b-dgal-HEX-1:5 6s:n-acetyl LIN 1:1o(4+1)2d 2:2o(3+1)3d 3:3d(2+1)4n 4:2o(4+1)5d 5:5d(2+1)6n	6
27	RES 1b:b-dglc-HEX-1:5 2b:b-dgal-HEX-1:5 3b:a-dgal-HEX-1:5 4b:b-dgal-HEX-1:5 5s:n-acetyl 6b:b-dgal-HEX-1:5 LIN 1:1o(4+1)2d 2:2o(4+1)3d 3:3o(3+1)4d 4:4d(2+1)5n 5:4o(3+1)6d	6
28	RES 1b:b-dglc-HEX-1:5 2b:b-dgal-HEX-1:5 3b:a-dgal-HEX-1:5 4b:b-dgal-HEX-1:5 5s:n-acetyl 6b:a-dgal-HEX-1:5 7s:n-acetyl LIN 1:1o(4+1)2d 2:2o(4+1)3d 3:3o(3+1)4d 4:4d(2+1)5n 5:4o(3+1)6d 6:6d(2+1)7n	7
29	RES 1b:a-dgal-HEX-1:5 2b:b-dgal-HEX-1:5 3s:n-acetyl 4b:b-dgal-HEX-1:5 LIN 1:1o(3+1)2d 2:2d(2+1)3n 3:2o(3+1)4d	4
30	RES 1b:b-dglc-HEX-1:5 2s:n-acetyl 3b:b-dgal-HEX-1:5 4b:a-dgro-dgal-NON-2:6|1:a|2:keto|3:d 5s:n-acetyl LIN 1:1d(2+1)2n 2:1o(3+1)3d 3:3o(3+2)4d 4:4d(5+1)5n	5
31	RES 1b:b-dgal-HEX-1:5 2b:b-dglc-HEX-1:5 3s:n-acetyl 4b:b-dgal-HEX-1:5 5b:b-dglc-HEX-1:5 6s:n-acetyl 7b:a-lgal-HEX-1:5|6:d 8b:b-dgal-HEX-1:5 LIN 1:1o(3+1)2d 2:2d(2+1)3n 3:2o(4+1)4d 4:4o(3+1)5d 5:5d(2+1)6n 6:5o(3+1)7d 7:5o(4+1)8d	8
32	RES 1b:a-dgal-HEX-1:5 2b:b-dgal-HEX-1:5 3s:n-acetyl 4b:b-dgal-HEX-1:5 5b:a-dgro-dgal-NON-2:6|1:a|2:keto|3:d 6s:n-acetyl LIN 1:1o(3+1)2d 2:2d(2+1)3n 3:2o(3+1)4d 4:4o(3+2)5d 5:5d(5+1)6n	6
33	RES 1b:x-dglc-HEX-1:5 2b:b-dgal-HEX-1:5 3b:a-dgal-HEX-1:5 LIN 1:1o(4+1)2d 2:2o(4+1)3d	3
34	RES 1b:x-dglc-HEX-1:5 2s:n-acetyl 3b:b-dgal-HEX-1:5 4b:a-dgal-HEX-1:5 LIN 1:1d(2+1)2n 2:1o(4+1)3d 3:3o(4+1)4d	4
35	RES 1b:b-dglc-HEX-1:5 2b:b-dgal-HEX-1:5 3b:b-dgal-HEX-1:5 4s:n-acetyl 5b:b-dgal-HEX-1:5 LIN 1:1o(4+1)2d 2:2o(4+1)3d 3:3d(2+1)4n 4:3o(3+1)5d	5
36	RES 1b:b-dglc-HEX-1:5 2b:b-dgal-HEX-1:5 3b:b-dgal-HEX-1:5 4s:n-acetyl 5b:b-dgal-HEX-1:5 6b:a-dgro-dgal-NON-2:6|1:a|2:keto|3:d 7s:n-acetyl LIN 1:1o(4+1)2d 2:2o(4+1)3d 3:3d(2+1)4n 4:3o(3+1)5d 5:5o(3+2)6d 6:6d(5+1)7n	7
37	RES 1b:b-dglc-HEX-1:5 2b:b-dgal-HEX-1:5 3b:a-dgro-dgal-NON-2:6|1:a|2:keto|3:d 4s:n-acetyl 5b:b-dgal-HEX-1:5 6s:n-acetyl 7b:b-dgal-HEX-1:5 8b:a-lgal-HEX-1:5|6:d LIN 1:1o(4+1)2d 2:2o(3+2)3d 3:3d(5+1)4n 4:2o(4+1)5d 5:5d(2+1)6n 6:5o(3+1)7d 7:7o(2+1)8d	8
38	RES 1b:b-dglc-HEX-1:5 2b:b-dgal-HEX-1:5 3b:a-dgro-dgal-NON-2:6|1:a|2:keto|3:d 4s:n-acetyl 5b:b-dgal-HEX-1:5 6s:n-acetyl 7b:b-dgal-HEX-1:5 LIN 1:1o(4+1)2d 2:2o(3+2)3d 3:3d(5+1)4n 4:2o(4+1)5d 5:5d(2+1)6n 6:5o(3+1)7d	7
39	RES 1b:b-dglc-HEX-1:5 2b:b-dgal-HEX-1:5 3b:a-dgro-dgal-NON-2:6|1:a|2:keto|3:d 4s:n-acetyl 5b:b-dgal-HEX-1:5 6s:n-acetyl LIN 1:1o(4+1)2d 2:2o(3+2)3d 3:3d(5+1)4n 4:2o(4+1)5d 5:5d(2+1)6n	6
40	RES 1b:b-dglc-HEX-1:5 2b:b-dgal-HEX-1:5 3b:a-dgro-dgal-NON-2:6|1:a|2:keto|3:d 4s:n-glycolyl 5b:b-dgal-HEX-1:5 6s:n-acetyl LIN 1:1o(4+1)2d 2:2o(3+2)3d 3:3d(5+1)4n 4:2o(4+1)5d 5:5d(2+1)6n	6
41	RES 1b:b-dglc-HEX-1:5 2b:b-dgal-HEX-1:5 3b:a-dgro-dgal-NON-2:6|1:a|2:keto|3:d 4s:n-acetyl LIN 1:1o(4+1)2d 2:2o(3+2)3d 3:3d(5+1)4n	4
42	RES 1b:b-dglc-HEX-1:5 2b:b-dgal-HEX-1:5 3b:a-dgro-dgal-NON-2:6|1:a|2:keto|3:d 4s:n-glycolyl LIN 1:1o(4+1)2d 2:2o(3+2)3d 3:3d(5+1)4n	4
43	RES 1b:b-dgal-HEX-1:5 2b:a-dgro-dgal-NON-2:6|1:a|2:keto|3:d 3s:n-acetyl LIN 1:1o(3+2)2d 2:2d(5+1)3n	3
44	RES 1b:b-dglc-HEX-1:5 2b:b-dgal-HEX-1:5 3b:a-dgro-dgal-NON-2:6|1:a|2:keto|3:d 4s:n-acetyl 5b:b-dgal-HEX-1:5 6s:n-acetyl 7b:b-dgal-HEX-1:5 8b:a-dgro-dgal-NON-2:6|1:a|2:keto|3:d 9s:n-acetyl LIN 1:1o(4+1)2d 2:2o(3+2)3d 3:3d(5+1)4n 4:2o(4+1)5d 5:5d(2+1)6n 6:5o(3+1)7d 7:7o(3+2)8d 8:8d(5+1)9n	9
45	RES 1b:b-dglc-HEX-1:5 2b:b-dgal-HEX-1:5 3b:b-dgal-HEX-1:5 4s:n-acetyl 5b:b-dgal-HEX-1:5 6b:a-lgal-HEX-1:5|6:d LIN 1:1o(4+1)2d 2:2o(4+1)3d 3:3d(2+1)4n 4:3o(3+1)5d 5:5o(2+1)6d	6
46	RES 1b:b-dglc-HEX-1:5 2b:b-dgal-HEX-1:5 3b:a-dgro-dgal-NON-2:6|1:a|2:keto|3:d 4s:n-acetyl 5b:a-dgro-dgal-NON-2:6|1:a|2:keto|3:d 6s:n-acetyl LIN 1:1o(4+1)2d 2:2o(3+2)3d 3:3d(5+1)4n 4:3o(8+2)5d 5:5d(5+1)6n	6
47	RES 1b:b-dglc-HEX-1:5 2b:b-dgal-HEX-1:5 3b:a-dgro-dgal-NON-2:6|1:a|2:keto|3:d 4s:n-glycolyl 5b:a-dgro-dgal-NON-2:6|1:a|2:keto|3:d 6s:n-glycolyl LIN 1:1o(4+1)2d 2:2o(3+2)3d 3:3d(5+1)4n 4:3o(8+2)5d 5:5d(5+1)6n	6
48	RES 1b:b-dglc-HEX-1:5 2b:b-dgal-HEX-1:5 3b:a-dgro-dgal-NON-2:6|1:a|2:keto|3:d 4s:n-acetyl 5b:a-dgro-dgal-NON-2:6|1:a|2:keto|3:d 6s:n-acetyl 7s:acetyl LIN 1:1o(4+1)2d 2:2o(3+2)3d 3:3d(5+1)4n 4:3o(8+2)5d 5:5d(5+1)6n 6:5o(9+1)7n	7
49	RES 1b:b-dglc-HEX-1:5 2b:b-dgal-HEX-1:5 3b:a-dgro-dgal-NON-2:6|1:a|2:keto|3:d 4s:n-acetyl 5b:b-dgal-HEX-1:5 6s:n-acetyl 7b:b-dgal-HEX-1:5 8b:a-dgro-dgal-NON-2:6|1:a|2:keto|3:d 9s:n-acetyl 10b:a-dgro-dgal-NON-2:6|1:a|2:keto|3:d 11s:n-acetyl LIN 1:1o(4+1)2d 2:2o(3+2)3d 3:3d(5+1)4n 4:2o(4+1)5d 5:5d(2+1)6n 6:5o(3+1)7d 7:7o(3+2)8d 8:8d(5+1)9n 9:8o(8+2)10d 10:10d(5+1)11n	11
50	RES 1b:b-dglc-HEX-1:5 2b:b-dgal-HEX-1:5 3b:a-dgro-dgal-NON-2:6|1:a|2:keto|3:d 4s:n-acetyl 5b:a-dgro-dgal-NON-2:6|1:a|2:keto|3:d 6s:n-acetyl 7b:b-dgal-HEX-1:5 8s:n-acetyl 9b:b-dgal-HEX-1:5 10b:a-dgro-dgal-NON-2:6|1:a|2:keto|3:d 11s:n-acetyl LIN 1:1o(4+1)2d 2:2o(3+2)3d 3:3d(5+1)4n 4:3o(8+2)5d 5:5d(5+1)6n 6:2o(4+1)7d 7:7d(2+1)8n 8:7o(3+1)9d 9:9o(3+2)10d 10:10d(5+1)11n	11
51	RES 1b:b-dglc-HEX-1:5 2b:b-dgal-HEX-1:5 3b:a-dgro-dgal-NON-2:6|1:a|2:keto|3:d 4s:n-acetyl 5b:a-dgro-dgal-NON-2:6|1:a|2:keto|3:d 6s:n-acetyl 7b:b-dgal-HEX-1:5 8s:n-acetyl 9b:b-dgal-HEX-1:5 10b:a-dgro-dgal-NON-2:6|1:a|2:keto|3:d 11s:n-acetyl 12b:a-dgro-dgal-NON-2:6|1:a|2:keto|3:d 13s:n-acetyl LIN 1:1o(4+1)2d 2:2o(3+2)3d 3:3d(5+1)4n 4:3o(8+2)5d 5:5d(5+1)6n 6:2o(4+1)7d 7:7d(2+1)8n 8:7o(3+1)9d 9:9o(3+…	13
52	RES 1b:b-dglc-HEX-1:5 2b:b-dgal-HEX-1:5 3b:a-dgro-dgal-NON-2:6|1:a|2:keto|3:d 4s:n-acetyl 5b:a-dgro-dgal-NON-2:6|1:a|2:keto|3:d 6s:n-acetyl 7b:a-dgro-dgal-NON-2:6|1:a|2:keto|3:d 8s:n-acetyl LIN 1:1o(4+1)2d 2:2o(3+2)3d 3:3d(5+1)4n 4:3o(8+2)5d 5:5d(5+1)6n 6:5o(8+2)7d 7:7d(5+1)8n	8
53	RES 1b:b-dglc-HEX-1:5 2b:b-dgal-HEX-1:5 3b:a-dgal-HEX-1:5 LIN 1:1o(4+1)2d 2:2o(4+1)3d	3
54	RES 1b:b-dglc-HEX-1:5 2b:b-dgal-HEX-1:5 3b:a-dgal-HEX-1:5 4b:a-dgal-HEX-1:5 LIN 1:1o(4+1)2d 2:2o(4+1)3d 3:3o(3+1)4d	4
55	RES 1b:b-dglc-HEX-1:5 2b:b-dgal-HEX-1:5 3b:a-dgal-HEX-1:5 4b:b-dgal-HEX-1:5 5s:n-acetyl LIN 1:1o(4+1)2d 2:2o(4+1)3d 3:3o(3+1)4d 4:4d(2+1)5n	5
56	RES 1b:b-dglc-HEX-1:5 2b:b-dgal-HEX-1:5 3b:b-dglc-HEX-1:5 4s:n-acetyl 5b:b-dgal-HEX-1:5 LIN 1:1o(4+1)2d 2:2o(3+1)3d 3:3d(2+1)4n 4:3o(4+1)5d	5
57	RES 1b:b-dglc-HEX-1:5 2b:b-dgal-HEX-1:5 3b:b-dglc-HEX-1:5 4s:n-acetyl 5b:b-dgal-HEX-1:5 6b:a-dgro-dgal-NON-2:6|1:a|2:keto|3:d 7s:n-acetyl LIN 1:1o(4+1)2d 2:2o(3+1)3d 3:3d(2+1)4n 4:3o(4+1)5d 5:5o(3+2)6d 6:6d(5+1)7n	7
58	RES 1b:b-dglc-HEX-1:5 2b:b-dgal-HEX-1:5 3b:b-dglc-HEX-1:5 4s:n-acetyl 5b:b-dgal-HEX-1:5 6b:a-dgro-dgal-NON-2:6|1:a|2:keto|3:d 7s:n-acetyl LIN 1:1o(4+1)2d 2:2o(3+1)3d 3:3d(2+1)4n 4:3o(4+1)5d 5:5o(6+2)6d 6:6d(5+1)7n	7
59	RES 1b:b-dglc-HEX-1:5 2b:b-dgal-HEX-1:5 LIN 1:1o(4+1)2d	2
60	RES 1b:b-dglc-HEX-1:5 2b:b-dgal-HEX-1:5 3s:sulfate LIN 1:1o(4+1)2d 2:2o(3+1)3n	3
61	RES 1b:b-dglc-HEX-1:5 2b:b-dgal-HEX-1:5 3s:sulfate 4b:b-dgal-HEX-1:5 5s:n-acetyl 6b:b-dgal-HEX-1:5 7s:sulfate LIN 1:1o(4+1)2d 2:2o(3+1)3n 3:2o(4+1)4d 4:4d(2+1)5n 5:4o(3+1)6d 6:6o(3+1)7n	7
62	RES 1b:b-dglc-HEX-1:5 2s:n-acetyl 3b:b-dgal-HEX-1:5 4b:b-dglc-HEX-1:5 5s:n-acetyl 6b:b-dgal-HEX-1:5 7b:a-lgal-HEX-1:5|6:d 8b:a-lgal-HEX-1:5|6:d LIN 1:1d(2+1)2n 2:1o(3+1)3d 3:3o(3+1)4d 4:4d(2+1)5n 5:4o(3+1)6d 6:4o(4+1)7d 7:1o(4+1)8d	8
63	RES 1b:b-dglc-HEX-1:5 2s:n-acetyl 3b:a-lgal-HEX-1:5|6:d 4b:b-dgal-HEX-1:5 5b:b-dglc-HEX-1:5 6s:n-acetyl 7b:b-dgal-HEX-1:5 8b:a-lgal-HEX-1:5|6:d LIN 1:1d(2+1)2n 2:1o(3+1)3d 3:1o(4+1)4d 4:4o(3+1)5d 5:5d(2+1)6n 6:5o(3+1)7d 7:5o(4+1)8d	8
64	RES 1b:b-dglc-HEX-1:5 2s:n-acetyl 3b:b-dgal-HEX-1:5 4b:b-dglc-HEX-1:5 5s:n-acetyl 6b:b-dgal-HEX-1:5 7b:a-lgal-HEX-1:5|6:d 8b:a-lgal-HEX-1:5|6:d 9b:a-lgal-HEX-1:5|6:d LIN 1:1d(2+1)2n 2:1o(3+1)3d 3:3o(3+1)4d 4:4d(2+1)5n 5:4o(3+1)6d 6:6o(2+1)7d 7:4o(4+1)8d 8:1o(4+1)9d	9
65	RES 1b:b-dglc-HEX-1:5 2s:n-acetyl 3b:a-lgal-HEX-1:5|6:d 4b:b-dgal-HEX-1:5 5b:b-dglc-HEX-1:5 6s:n-acetyl 7b:a-lgal-HEX-1:5|6:d 8b:b-dgal-HEX-1:5 LIN 1:1d(2+1)2n 2:1o(3+1)3d 3:1o(4+1)4d 4:4o(3+1)5d 5:5d(2+1)6n 6:5o(3+1)7d 7:5o(4+1)8d	8
66	RES 1b:b-dglc-HEX-1:5 2s:n-acetyl 3b:a-lgal-HEX-1:5|6:d 4b:b-dgal-HEX-1:5 5b:b-dglc-HEX-1:5 6s:n-acetyl 7b:a-lgal-HEX-1:5|6:d 8b:b-dgal-HEX-1:5 9b:a-lgal-HEX-1:5|6:d LIN 1:1d(2+1)2n 2:1o(3+1)3d 3:1o(4+1)4d 4:4o(3+1)5d 5:5d(2+1)6n 6:5o(3+1)7d 7:5o(4+1)8d 8:8o(2+1)9d	9
67	RES 1b:b-dglc-HEX-1:5 2s:n-acetyl 3b:b-dgal-HEX-1:5 4b:a-dgro-dgal-NON-2:6|1:a|2:keto|3:d 5s:n-acetyl 6b:a-dgro-dgal-NON-2:6|1:a|2:keto|3:d 7s:n-acetyl LIN 1:1d(2+1)2n 2:1o(3+1)3d 3:3o(3+2)4d 4:4d(5+1)5n 5:1o(6+2)6d 6:6d(5+1)7n	7
68	RES 1b:b-dgal-HEX-1:5 2b:a-dgal-HEX-1:5 LIN 1:1o(4+1)2d	2
69	RES 1b:b-dglc-HEX-1:5 2b:b-dgal-HEX-1:5 3b:b-dglc-HEX-1:5 4s:n-acetyl 5b:b-dgal-HEX-1:5 LIN 1:1o(4+1)2d 2:2o(3+1)3d 3:3d(2+1)4n 4:3o(3+1)5d	5
70	RES 1b:b-dglc-HEX-1:5 2b:b-dgal-HEX-1:5 3b:a-dgro-dgal-NON-2:6|1:a|2:keto|3:d 4s:n-acetyl 5b:a-dgro-dgal-NON-2:6|1:a|2:keto|3:d 6s:n-acetyl LIN 1:1o(4+1)2d 2:2o(6+2)3d 3:3d(5+1)4n 4:3o(9+2)5d 5:5d(5+1)6n	6
71	RES 1b:b-dglc-HEX-1:5 2s:n-acetyl 3b:b-dgal-HEX-1:5 4b:b-dglc-HEX-1:5 5s:n-acetyl 6b:b-dgal-HEX-1:5 7b:b-dglc-HEX-1:5 8s:n-acetyl 9b:b-dgal-HEX-1:5 LIN 1:1d(2+1)2n 2:1o(4+1)3d 3:3o(3+1)4d 4:4d(2+1)5n 5:4o(4+1)6d 6:3o(6+1)7d 7:7d(2+1)8n 8:7o(4+1)9d	9
72	RES 1b:b-dglc-HEX-1:5 2s:n-acetyl 3b:b-dgal-HEX-1:5 4b:b-dglc-HEX-1:5 5s:n-acetyl 6b:b-dgal-HEX-1:5 LIN 1:1d(2+1)2n 2:1o(4+1)3d 3:3o(3+1)4d 4:4d(2+1)5n 5:4o(4+1)6d	6
73	RES 1b:b-dgal-HEX-1:5 2b:b-dglc-HEX-1:5 3s:n-acetyl 4b:b-dgal-HEX-1:5 LIN 1:1o(3+1)2d 2:2d(2+1)3n 3:2o(4+1)4d	4
74	RES 1b:b-dglc-HEX-1:5 2s:n-acetyl 3b:b-dgal-HEX-1:5 4s:sulfate LIN 1:1d(2+1)2n 2:1o(4+1)3d 3:1o(6+1)4n	4
75	RES 1b:b-dglc-HEX-1:5 2s:n-acetyl 3b:a-lgal-HEX-1:5|6:d 4b:b-dgal-HEX-1:5 5s:sulfate LIN 1:1d(2+1)2n 2:1o(3+1)3d 3:1o(4+1)4d 4:1o(6+1)5n	5
76	RES 1b:b-dglc-HEX-1:5 2s:n-acetyl 3b:b-dgal-HEX-1:5 4b:a-dgro-dgal-NON-2:6|1:a|2:keto|3:d 5s:n-acetyl 6s:sulfate LIN 1:1d(2+1)2n 2:1o(4+1)3d 3:3o(3+2)4d 4:4d(5+1)5n 5:1o(6+1)6n	6
77	RES 1b:b-dglc-HEX-1:5 2s:n-acetyl 3b:b-dgal-HEX-1:5 4s:sulfate 5s:sulfate LIN 1:1d(2+1)2n 2:1o(4+1)3d 3:3o(6+1)4n 4:1o(6+1)5n	5
78	RES 1b:b-dgal-HEX-1:5 2b:b-dglc-HEX-1:5 3s:n-acetyl 4b:b-dgal-HEX-1:5 5s:sulfate 6s:sulfate 7s:sulfate LIN 1:1o(3+1)2d 2:2d(2+1)3n 3:2o(4+1)4d 4:4o(6+1)5n 5:2o(6+1)6n 6:1o(6+1)7n	7
79	RES 1b:x-dglc-HEX-1:5 2s:n-acetyl 3b:b-dgal-HEX-1:5 4s:n-acetyl LIN 1:1d(2+1)2n 2:1o(4+1)3d 3:3d(2+1)4n	4
80	RES 1b:x-dglc-HEX-1:5 2s:n-acetyl 3b:a-lgal-HEX-1:5|6:d 4b:b-dgal-HEX-1:5 5s:n-acetyl LIN 1:1d(2+1)2n 2:1o(3+1)3d 3:1o(4+1)4d 4:4d(2+1)5n	5
81	RES 1b:x-dglc-HEX-1:5 2s:n-acetyl 3b:b-dgal-HEX-1:5 4b:a-dgal-HEX-1:5 LIN 1:1d(2+1)2n 2:1o(4+1)3d 3:3o(3+1)4d	4
82	RES 1b:x-dglc-HEX-1:5 2s:n-acetyl 3b:b-dgal-HEX-1:5 4b:b-dglc-HEX-1:5 5s:n-acetyl 6b:a-lgal-HEX-1:5|6:d 7b:b-dgal-HEX-1:5 8b:a-lgal-HEX-1:5|6:d LIN 1:1d(2+1)2n 2:1o(4+1)3d 3:3o(3+1)4d 4:4d(2+1)5n 5:4o(3+1)6d 6:4o(4+1)7d 7:7o(2+1)8d	8
83	RES 1b:x-dgal-HEX-1:5 2b:b-dglc-HEX-1:5 3s:n-acetyl 4b:b-dgal-HEX-1:5 5b:a-lgal-HEX-1:5|6:d LIN 1:1o(3+1)2d 2:2d(2+1)3n 3:2o(3+1)4d 4:2o(4+1)5d	5
84	RES 1b:b-dglc-HEX-1:5 2s:n-acetyl 3b:a-lgal-HEX-1:5|6:d 4b:b-dgal-HEX-1:5 5b:b-dglc-HEX-1:5 6s:n-acetyl 7b:b-dgal-HEX-1:5 8b:a-dgro-dgal-NON-2:6|1:a|2:keto|3:d 9s:n-acetyl LIN 1:1d(2+1)2n 2:1o(3+1)3d 3:1o(4+1)4d 4:4o(3+1)5d 5:5d(2+1)6n 6:5o(4+1)7d 7:7o(6+2)8d 8:8d(5+1)9n	9
85	RES 1b:b-dgal-HEX-1:5 2b:a-lgal-HEX-1:5|6:d LIN 1:1o(2+1)2d	2
86	RES 1b:b-dglc-HEX-1:5 2s:n-acetyl 3b:b-dgal-HEX-1:5 4b:a-lgal-HEX-1:5|6:d LIN 1:1d(2+1)2n 2:1o(3+1)3d 3:3o(2+1)4d	4
87	RES 1b:b-dglc-HEX-1:5 2s:n-acetyl 3b:b-dgal-HEX-1:5 4b:a-lgal-HEX-1:5|6:d LIN 1:1d(2+1)2n 2:1o(4+1)3d 3:3o(2+1)4d	4
88	RES 1b:a-dgal-HEX-1:5 2s:n-acetyl 3b:b-dgal-HEX-1:5 4b:a-lgal-HEX-1:5|6:d LIN 1:1d(2+1)2n 2:1o(3+1)3d 3:3o(2+1)4d	4
89	RES 1b:b-dgal-HEX-1:5 2s:n-acetyl 3b:b-dgal-HEX-1:5 4b:a-lgal-HEX-1:5|6:d LIN 1:1d(2+1)2n 2:1o(3+1)3d 3:3o(2+1)4d	4
90	RES 1b:b-dgal-HEX-1:5 2b:a-lgal-HEX-1:5|6:d 3b:a-dgal-HEX-1:5 4s:n-acetyl LIN 1:1o(2+1)2d 2:1o(3+1)3d 3:3d(2+1)4n	4
91	RES 1b:b-dglc-HEX-1:5 2s:n-acetyl 3b:b-dgal-HEX-1:5 4b:a-lgal-HEX-1:5|6:d 5b:a-dgal-HEX-1:5 6s:n-acetyl LIN 1:1d(2+1)2n 2:1o(3+1)3d 3:3o(2+1)4d 4:3o(3+1)5d 5:5d(2+1)6n	6
92	RES 1b:b-dglc-HEX-1:5 2s:n-acetyl 3b:b-dgal-HEX-1:5 4b:a-lgal-HEX-1:5|6:d 5b:a-dgal-HEX-1:5 6s:n-acetyl LIN 1:1d(2+1)2n 2:1o(4+1)3d 3:3o(2+1)4d 4:3o(3+1)5d 5:5d(2+1)6n	6
93	RES 1b:a-dgal-HEX-1:5 2s:n-acetyl 3b:b-dgal-HEX-1:5 4b:a-lgal-HEX-1:5|6:d 5b:a-dgal-HEX-1:5 6s:n-acetyl LIN 1:1d(2+1)2n 2:1o(3+1)3d 3:3o(2+1)4d 4:3o(3+1)5d 5:5d(2+1)6n	6
94	RES 1b:b-dgal-HEX-1:5 2s:n-acetyl 3b:b-dgal-HEX-1:5 4b:a-lgal-HEX-1:5|6:d 5b:a-dgal-HEX-1:5 6s:n-acetyl LIN 1:1d(2+1)2n 2:1o(3+1)3d 3:3o(2+1)4d 4:3o(3+1)5d 5:5d(2+1)6n	6
95	RES 1b:b-dglc-HEX-1:5 2s:n-acetyl 3b:b-dgal-HEX-1:5 4b:a-lgal-HEX-1:5|6:d 5b:a-dgal-HEX-1:5 6s:n-acetyl 7b:a-lgal-HEX-1:5|6:d LIN 1:1d(2+1)2n 2:1o(3+1)3d 3:3o(2+1)4d 4:3o(3+1)5d 5:5d(2+1)6n 6:1o(4+1)7d	7
96	RES 1b:b-dglc-HEX-1:5 2s:n-acetyl 3b:a-lgal-HEX-1:5|6:d 4b:b-dgal-HEX-1:5 5b:a-lgal-HEX-1:5|6:d 6b:a-dgal-HEX-1:5 7s:n-acetyl LIN 1:1d(2+1)2n 2:1o(3+1)3d 3:1o(4+1)4d 4:4o(2+1)5d 5:4o(3+1)6d 6:6d(2+1)7n	7
97	RES 1b:b-dglc-HEX-1:5 2s:n-acetyl 3b:b-dgal-HEX-1:5 4b:a-lgal-HEX-1:5|6:d 5b:a-dgal-HEX-1:5 LIN 1:1d(2+1)2n 2:1o(4+1)3d 3:3o(2+1)4d 4:3o(3+1)5d	5
98	RES 1b:b-dgal-HEX-1:5 2s:n-acetyl 3b:a-lgal-HEX-1:5|6:d LIN 1:1d(2+1)2n 2:1o(3+1)3d	3
99	RES 1b:x-dgal-HEX-1:5 2b:a-dgro-dgal-NON-2:6|1:a|2:keto|3:d 3s:n-acetyl LIN 1:1o(3+2)2d 2:2d(5+1)3n	3
100	RES 1b:x-dgal-HEX-1:5 2b:a-dgro-dgal-NON-2:6|1:a|2:keto|3:d 3s:n-glycolyl LIN 1:1o(3+2)2d 2:2d(5+1)3n	3
101	RES 1b:x-dgal-HEX-1:5 2b:a-dgro-dgal-NON-2:6|1:a|2:keto|3:d 3s:n-glycolyl LIN 1:1o(3+2)2d 2:2d(5+1)3n	3
102	RES 1b:b-dgal-HEX-1:5 2b:a-dgro-dgal-NON-2:6|1:a|2:keto|3:d 3s:n-acetyl LIN 1:1o(3+2)2d 2:2d(5+1)3n	3
103	RES 1b:x-dglc-HEX-1:5 2b:b-dgal-HEX-1:5 3b:a-dgro-dgal-NON-2:6|1:a|2:keto|3:d 4s:n-acetyl LIN 1:1o(4+1)2d 2:2o(3+2)3d 3:3d(5+1)4n	4
104	RES 1b:x-dgal-HEX-1:5 2b:a-dgro-dgal-NON-2:6|1:a|2:keto|3:d 3s:n-glycolyl 4b:a-dgro-dgal-NON-2:6|1:a|2:keto|3:d 5s:n-acetyl LIN 1:1o(3+2)2d 2:2d(5+1)3n 3:2o(8+2)4d 4:4d(5+1)5n	5
105	RES 1b:x-dgal-HEX-1:5 2b:a-dgro-dgal-NON-2:6|1:a|2:keto|3:d 3s:n-glycolyl 4b:a-dgro-dgal-NON-2:6|1:a|2:keto|3:d 5s:n-glycolyl LIN 1:1o(3+2)2d 2:2d(5+1)3n 3:2o(8+2)4d 4:4d(5+1)5n	5
106	RES 1b:x-dgal-HEX-1:5 2b:a-dgro-dgal-NON-2:6|1:a|2:keto|3:d 3s:n-acetyl 4b:a-dgro-dgal-NON-2:6|1:a|2:keto|3:d 5s:n-acetyl LIN 1:1o(3+2)2d 2:2d(5+1)3n 3:2o(8+2)4d 4:4d(5+1)5n	5
107	RES 1b:x-dgal-HEX-1:5 2b:a-dgro-dgal-NON-2:6|1:a|2:keto|3:d 3s:n-acetyl 4b:a-dgro-dgal-NON-2:6|1:a|2:keto|3:d 5s:n-glycolyl LIN 1:1o(3+2)2d 2:2d(5+1)3n 3:2o(8+2)4d 4:4d(5+1)5n	5
108	RES 1b:b-dgal-HEX-1:5 2b:a-dgro-dgal-NON-2:6|1:a|2:keto|3:d 3s:n-acetyl 4b:b-dgal-HEX-1:5 5s:n-acetyl LIN 1:1o(3+2)2d 2:2d(5+1)3n 3:1o(4+1)4d 4:4d(2+1)5n	5
109	RES 1b:x-dglc-HEX-1:5 2b:b-dgal-HEX-1:5 3b:a-dgro-dgal-NON-2:6|1:a|2:keto|3:d 4s:n-glycolyl LIN 1:1o(4+1)2d 2:2o(3+2)3d 3:3d(5+1)4n	4
110	RES 1b:x-dglc-HEX-1:5 2s:n-acetyl 3b:b-dgal-HEX-1:5 4b:a-dgro-dgal-NON-2:6|1:a|2:keto|3:d 5s:n-acetyl LIN 1:1d(2+1)2n 2:1o(4+1)3d 3:3o(3+2)4d 4:4d(5+1)5n	5
111	RES 1b:x-dglc-HEX-1:5 2s:n-acetyl 3b:b-dgal-HEX-1:5 4b:a-dgro-dgal-NON-2:6|1:a|2:keto|3:d 5s:n-glycolyl LIN 1:1d(2+1)2n 2:1o(4+1)3d 3:3o(3+2)4d 4:4d(5+1)5n	5
112	RES 1b:x-dglc-HEX-1:5 2b:b-dgal-HEX-1:5 3b:a-dgro-dgal-NON-2:6|1:a|2:keto|3:d 4s:n-acetyl 5b:a-dgro-dgal-NON-2:6|1:a|2:keto|3:d 6s:n-acetyl LIN 1:1o(4+1)2d 2:2o(3+2)3d 3:3d(5+1)4n 4:3o(8+2)5d 5:5d(5+1)6n	6
113	RES 1b:x-dglc-HEX-1:5 2b:b-dgal-HEX-1:5 3b:a-dgro-dgal-NON-2:6|1:a|2:keto|3:d 4s:n-glycolyl 5b:a-dgro-dgal-NON-2:6|1:a|2:keto|3:d 6s:n-acetyl LIN 1:1o(4+1)2d 2:2o(3+2)3d 3:3d(5+1)4n 4:3o(8+2)5d 5:5d(5+1)6n	6
114	RES 1b:x-dglc-HEX-1:5 2s:n-acetyl 3b:b-dgal-HEX-1:5 4b:b-dgal-HEX-1:5 5s:n-acetyl LIN 1:1d(2+1)2n 2:1o(4+1)3d 3:3o(3+1)4d 4:4d(2+1)5n	5
115	RES 1b:b-dglc-HEX-1:5 2b:a-lgal-HEX-1:5|6:d 3b:b-dgal-HEX-1:5 LIN 1:1o(3+1)2d 2:1o(4+1)3d	3
116	RES 1b:b-dgal-HEX-1:5 2b:a-dgro-dgal-NON-2:6|1:a|2:keto|3:d 3s:n-glycolyl 4b:b-dgal-HEX-1:5 5s:n-acetyl LIN 1:1o(3+2)2d 2:2d(5+1)3n 3:1o(4+1)4d 4:4d(2+1)5n	5
117	RES 1b:x-dgal-HEX-1:5 2b:b-dgal-HEX-1:5 3s:n-acetyl LIN 1:1o(4+1)2d 2:2d(2+1)3n	3
118	RES 1b:x-dglc-HEX-1:5 2b:b-dgal-HEX-1:5 3b:b-dglc-HEX-1:5 4s:n-acetyl 5b:b-dgal-HEX-1:5 LIN 1:1o(4+1)2d 2:2o(3+1)3d 3:3d(2+1)4n 4:3o(3+1)5d	5
119	RES 1b:x-dglc-HEX-1:5 2b:b-dgal-HEX-1:5 3b:b-dglc-HEX-1:5 4s:n-acetyl 5b:b-dgal-HEX-1:5 6b:a-dgro-dgal-NON-2:6|1:a|2:keto|3:d 7s:n-acetyl LIN 1:1o(4+1)2d 2:2o(3+1)3d 3:3d(2+1)4n 4:3o(3+1)5d 5:5o(3+2)6d 6:6d(5+1)7n	7
120	RES 1b:x-dgal-HEX-1:5 2s:n-acetyl 3b:b-dgal-HEX-1:5 LIN 1:1d(2+1)2n 2:1o(3+1)3d	3
121	RES 1b:x-dgal-HEX-1:5 2s:n-acetyl 3b:b-dgal-HEX-1:5 4b:a-dgro-dgal-NON-2:6|1:a|2:keto|3:d 5s:n-acetyl LIN 1:1d(2+1)2n 2:1o(3+1)3d 3:3o(3+2)4d 4:4d(5+1)5n	5
122	RES 1b:x-dgal-HEX-1:5 2s:n-acetyl 3b:b-dgal-HEX-1:5 4b:a-dgro-dgal-NON-2:6|1:a|2:keto|3:d 5s:n-acetyl 6b:a-dgro-dgal-NON-2:6|1:a|2:keto|3:d 7s:n-acetyl LIN 1:1d(2+1)2n 2:1o(3+1)3d 3:3o(3+2)4d 4:4d(5+1)5n 5:4o(8+2)6d 6:6d(5+1)7n	7
123	RES 1b:x-dglc-HEX-1:5 2b:b-dgal-HEX-1:5 3b:b-dglc-HEX-1:5 4s:n-acetyl 5b:b-dgal-HEX-1:5 LIN 1:1o(4+1)2d 2:2o(3+1)3d 3:3d(2+1)4n 4:3o(4+1)5d	5
124	RES 1b:x-dgal-HEX-1:5 2b:a-dgro-dgal-NON-2:6|1:a|2:keto|3:d 3s:n-acetyl LIN 1:1o(6+2)2d 2:2d(5+1)3n	3
125	RES 1b:x-dgal-HEX-1:5 2s:n-acetyl 3b:a-dgro-dgal-NON-2:6|1:a|2:keto|3:d 4s:n-acetyl LIN 1:1d(2+1)2n 2:1o(6+2)3d 3:3d(5+1)4n	4
126	RES 1b:b-dgal-HEX-1:5 2b:b-dglc-HEX-1:5 3s:n-acetyl 4b:b-dgal-HEX-1:5 5b:a-dgro-dgal-NON-2:6|1:a|2:keto|3:d 6s:n-acetyl LIN 1:1o(3+1)2d 2:2d(2+1)3n 3:2o(4+1)4d 4:4o(6+2)5d 5:5d(5+1)6n	6
127	RES 1b:x-dgal-HEX-1:5 2b:b-dglc-HEX-1:5 3s:n-acetyl LIN 1:1o(3+1)2d 2:2d(2+1)3n	3
128	RES 1b:x-dglc-HEX-1:5 2s:n-acetyl 3b:b-dgal-HEX-1:5 4b:b-dglc-HEX-1:5 5s:n-acetyl LIN 1:1d(2+1)2n 2:1o(4+1)3d 3:3o(3+1)4d 4:4d(2+1)5n	5
Query dataset composition
Query size in terms of residues	Number of structures
2	4
3	17
4	20
5	29
6	22
7	17
8	9
9	6
11	3
13	1
