# Supplementary material for: Property Graph vs RDF Triple Store: A Comparison on Glycan Substructure Search
Source: PLoS One. 2015 Dec 14;10(12):e0144578. doi: 10.1371/journal.pone.0144578 (PMC4684231; doi:10.1371/journal.pone.0144578)
Supplement: S11 Table — A complete list of all the monosaccharides and substituents used during the study. (XLSX) [file pone.0144578.s012.xlsx]

## Sheet: Sheet1
Monosaccaride		Substituent
Altrose		Acetyl
Arabinose		Bromo
Bacillosamine		Chloro
DeoxyAltrose		Ethyl
DeoxyHexose		Ethanolamine
Fructose		Fluoro
Galactose		Formyl
Glucose		Glycolyl
Hexose		Hydroxymethyl
Idose		Imino
Sialic acid		Iodo
Mannose		RLactate1
Pentose		SLactate1
Quinovose		Methyl
Rhamnose		N
Xylose		NAcetyl
Fucose		NAlanine
Glycerose		NDimethyl
		NFormyl
		NGlycolyl
		NMethyl
		NSuccinate
		NSulfate
		NTriflouroacetyl
		Nitrat
		Phosphate
		Pyruvate
		Sulfate
		Thio
		RPyruvate
		SPyruvate
		RLactate2
		SLactate2
